# Supplementary material for: High field antiferroelectric-like dielectric of poly(vinylidene fluoride-co-trifluoroethylene-co-chlorotrifluoroethylene)-graft-poly(styrene-methyl methacrylate) for high pulse capacitors with high energy density and low loss
Source: Royal Society of Chemistry journal article supplement (doi:10.1039/c9py00540d), 2019-01-01
Supplement: c9py00540d1.pdf [file c9py00540d1.pdf]

## Electronic Supplementary Information (ESI)

### **Antiferroelectric-like Dielectric of Ploy(vinylidene fluoride-co-trifluoroethylene-co-chlorotrifluoroethylene)-graft-poly(styrene-methyl methacrylate) for High Pulse Capacitors with High Energy Density and Low Loss**

Jingjing Liu<sup>a</sup>, Jiani Liao<sup>a</sup>, Yu Liao<sup>\*b</sup> and Zhicheng Zhang<sup>\*a</sup>

<sup>a</sup> Department of Applied Chemistry, Xi'an Key Laboratory of Sustainable Energy Materials Chemistry, MOE Key Laboratory for Nonequilibrium Synthesis and Modulation of Condensed Matter, School of Science, Xi'an Jiaotong University, Xi'an, P. R. China, 710049

Email: zhichengzhang@mail.xjtu.edu.cn.

<sup>b</sup> Chengdu Hongming Electronics Co., Ltd, Cheng Du, P. R. China, 610100.

Email: liaoyu@chinahongming.com.

**Figures**

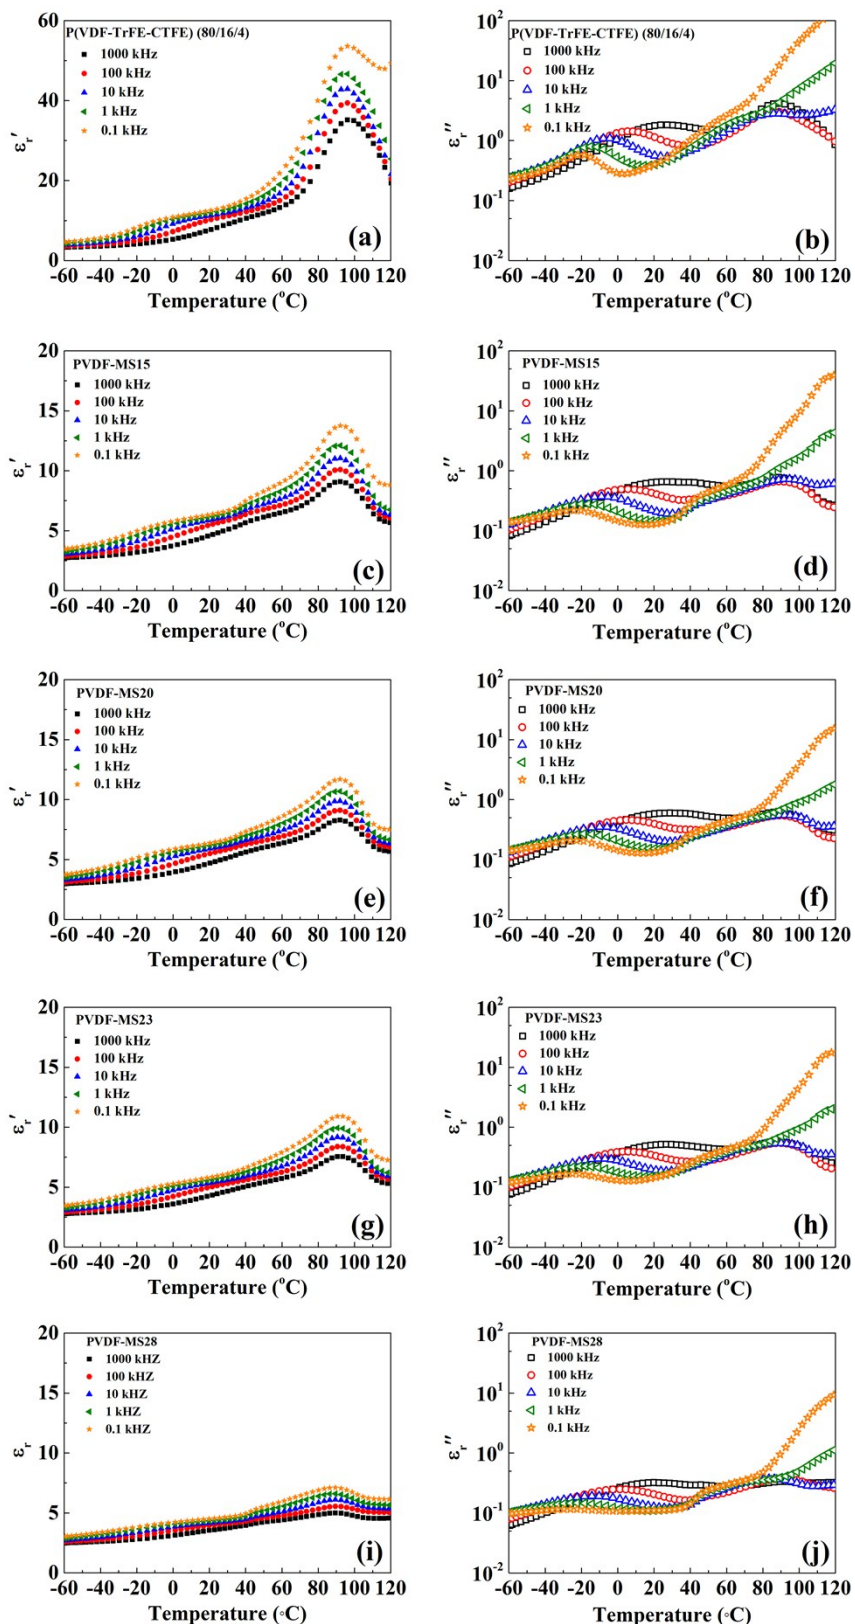

**Fig. S1.** The dielectric constant real part ( $\epsilon_r'$ ) and imaginary part ( $\epsilon_r''$ ) as a function of temperature at different frequency for P(VDF-TrFE-CTFE) and grafted copolymers.

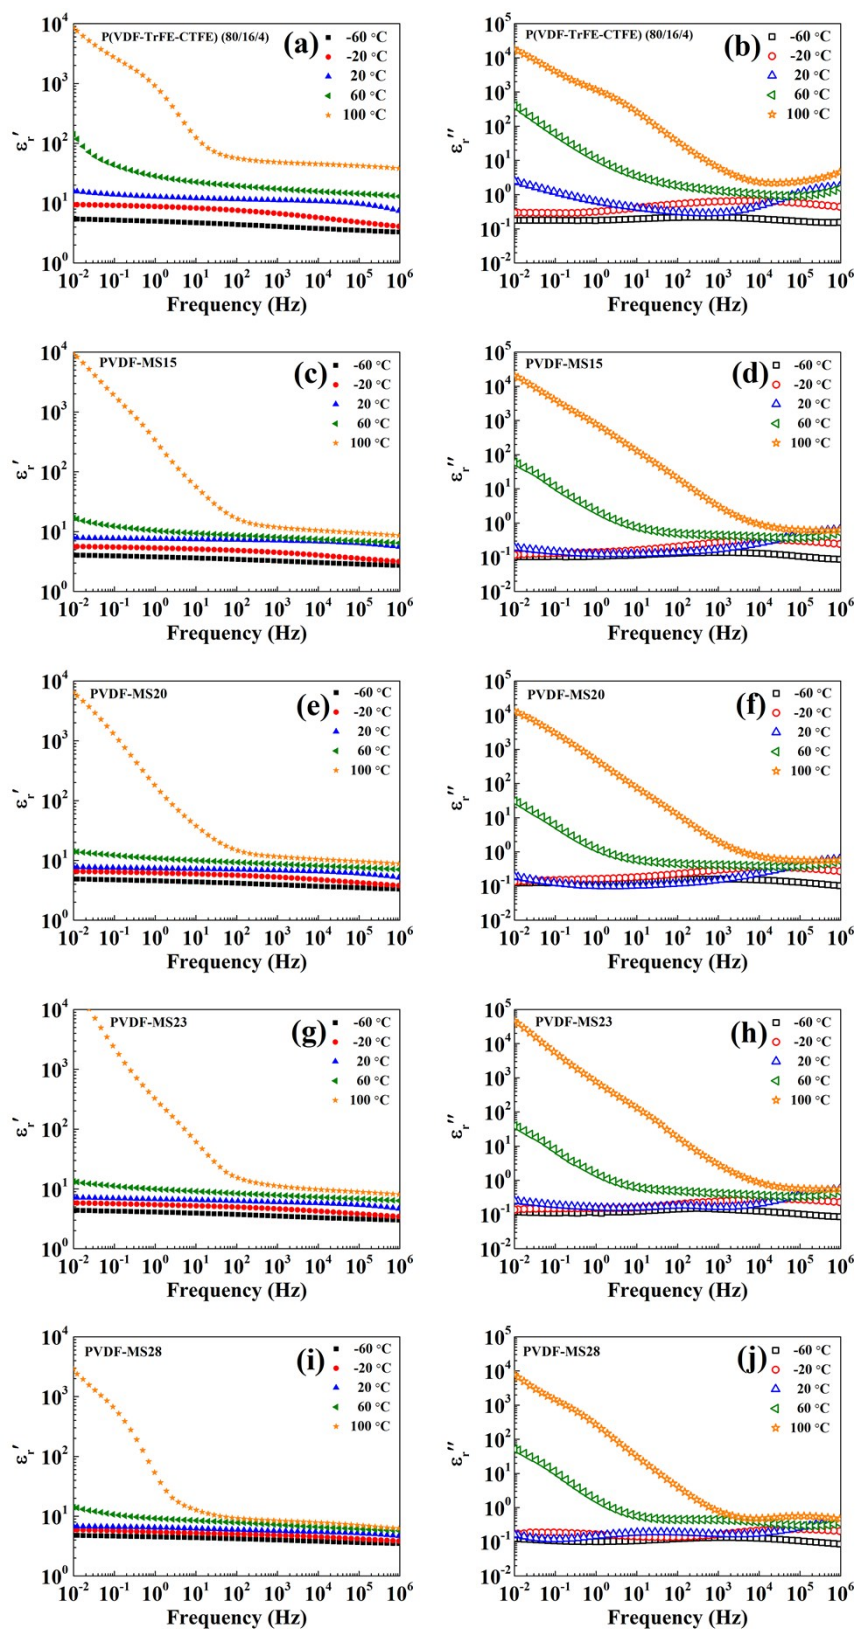

**Fig. S2.** The dielectric constant real part ( $\epsilon_r'$ ) and imaginary part ( $\epsilon_r''$ ) as a function of frequency at different temperature for P(VDF-TrFE-CTFE) and grafted copolymers.

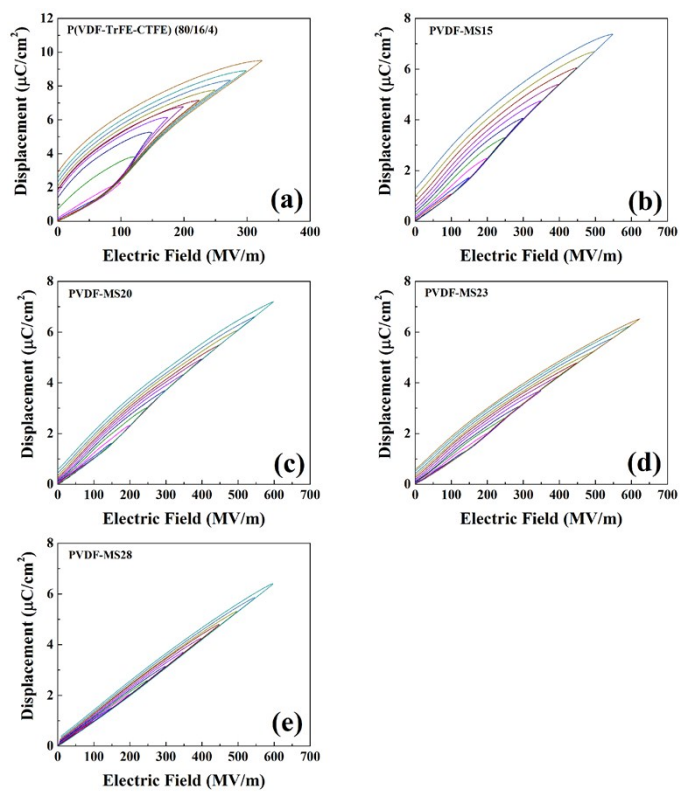

Fig. S3. Monopolar D-E loops of P(VDF-TrFE-CTFE) and grafted copolymers.
